# Supplementary material for: Diagnosis, treatment and survival from bladder, upper urinary tract, and urethral cancers: real‐world findings from NHS England between 2013 and 2019
Source: PubMed Central journal article supplement (PMC10952282; doi:10.1111/bju.15970), 2023-02-07
Supplement: BJU-131-734-s001.pdf [file BJU-131-734-s001.pdf]

## Supplementary Material

### **Diagnosis, treatment and survival from Bladder, Upper Urinary Tract and Urethral Cancers: Real world findings from NHS England between 2013 and 2019**

#### **SUPPLEMENTARY CONTENT**

1. Appendix 1. Dictionary of Source data used in this report
2. Supplementary figures 1 to 10
3. Supplementary tables 1 to 2.

## Appendix 1. Data sources used in this report

### GDO UCC data (2013-19)

<https://www.cancerdata.nhs.uk/getdataout/bladder>

- Bladder, UTUC and Urethral cancer: Case numbers and incidence rates 2013-2019
- Split into Malignant and in situ vs. uncertain
- Stage: NMI, MIBC, unknown, all stages. NMI split into Ta, Tis, Ta/Tis, T1 and NOS
- Grade: all, grade 1, grade 2, grade 3, unknown
- Route of diagnosis (2013-18)
- Survival: Net and Kaplan-Meier survival up to 84 months

### GDO All 15 cancers data

<https://www.cancerdata.nhs.uk/getdataout/data>

### Prevalence

<https://www.cancerdata.nhs.uk/prevalence>

- Prevalence in 2019 for BC only
- vs. age, ethnicity, sex, stage (invasive vs/ invasive/non-invasive), CCG/Cancer Alliance, IMD, Years since diagnosis

### Routes to diagnosis details (2006-16)

<https://www.cancerdata.nhs.uk/routestodiagnosis>

- vs. Age, IMD, Alliance, Stage (all vs. in situ BC)

### Survival

<https://www.cancerdata.nhs.uk/survival/indexofcancersurvival>

- Survival by CCG
- Trends in survival

<https://digital.nhs.uk/data-and-information/publications/statistical/cancer-survival-in-england/cancers-diagnosed-2015-to-2019-followed-up-to-2020>

- Survival by sex, stage, age
- Survival for other cancers

### Treatment (2013-19)

<https://www.cancerdata.nhs.uk/treatments>

- Treatments as individual options
- Treatment combinations
- Vs. Age, Ethnicity, CCI, IMD, Gender, Stage and Year of diagnosis

### Radiotherapy used

<https://www.cancerdata.nhs.uk/radiotherapy/dashboard>

- Vs. Cancer alliance, disease group. Age group, intent, year, sex

### Emergency presentation

<https://www.cancerdata.nhs.uk/emergencypresentations>

### Staging data

[https://www.cancerdata.nhs.uk/stage\\_at\\_diagnosis](https://www.cancerdata.nhs.uk/stage_at_diagnosis)

- Geography (alliance, CCG etc.)
- Trends (%) per year
- Trends by site

## Supplementary figures

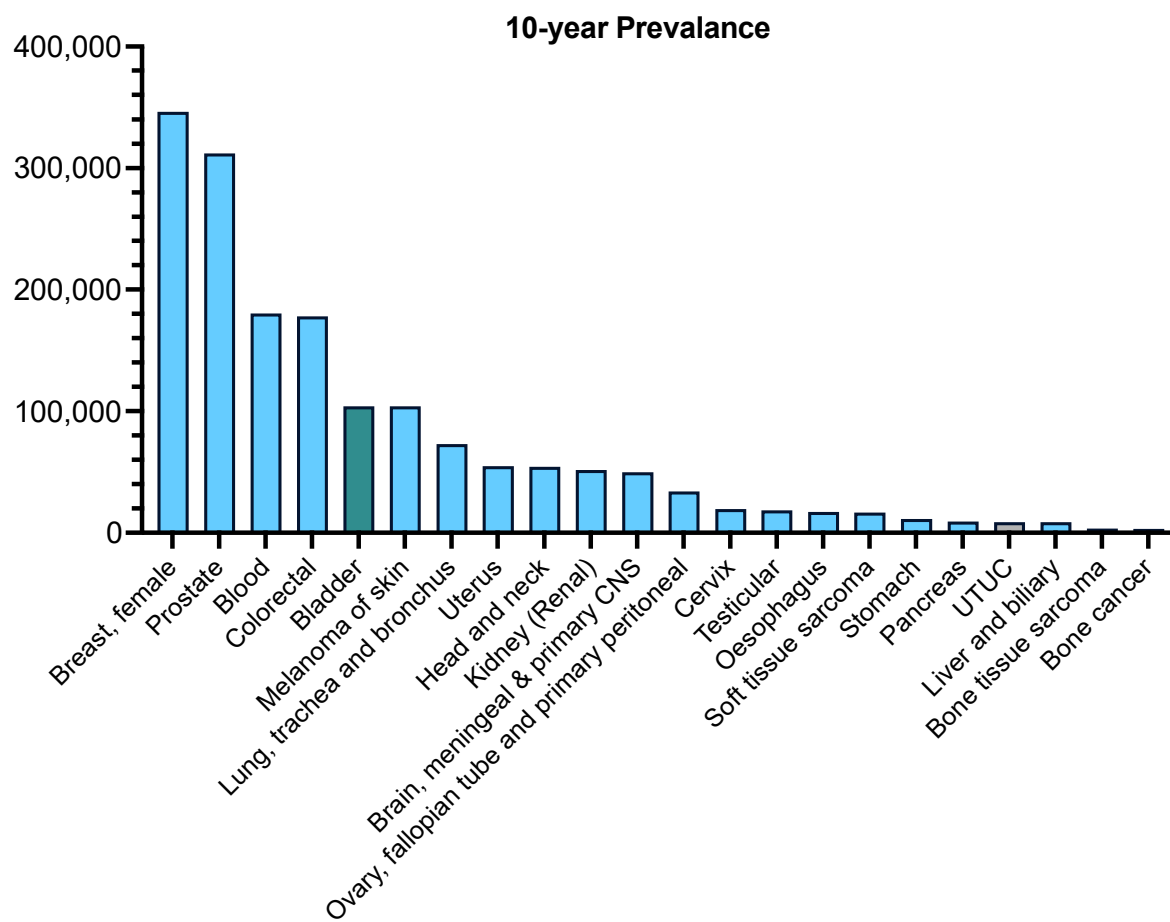

**Supplementary figure 1. Prevalence of Bladder Cancer and UTUC 10-years since diagnosis.**

In 2019, there were 104,192 persons living with bladder cancer (green) and 8,625 living with UTUC (grey) 10 years after diagnosis.

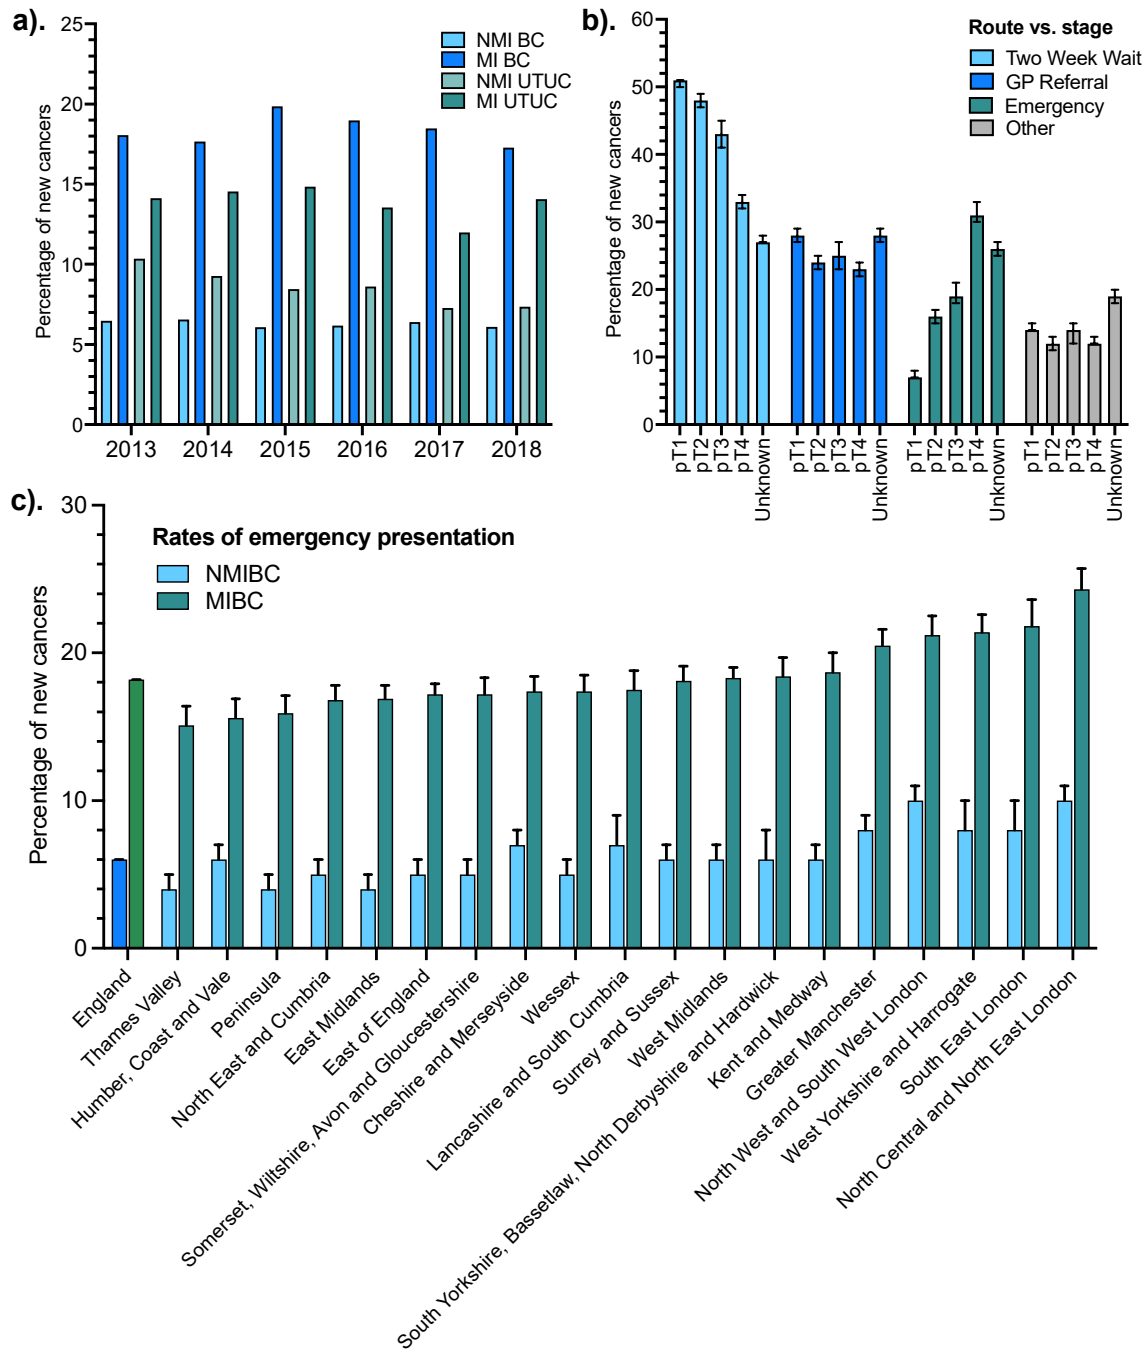

**Supplementary figure 2. Emergency presentation of bladder cancer.** a). Percentage of non-muscle invasive (NMI) and muscle invasive (MI) bladder cancers (BCs) and UTUCs presenting as an emergency from 2013 to 2018, b). Route to diagnosis for bladder cancer with respect to tumour stage (tumour from 2013-18). c). Percentage of MI and NMI bladder cancers presenting as an emergency for each NHS cancer alliance (compared to average for England in bold).

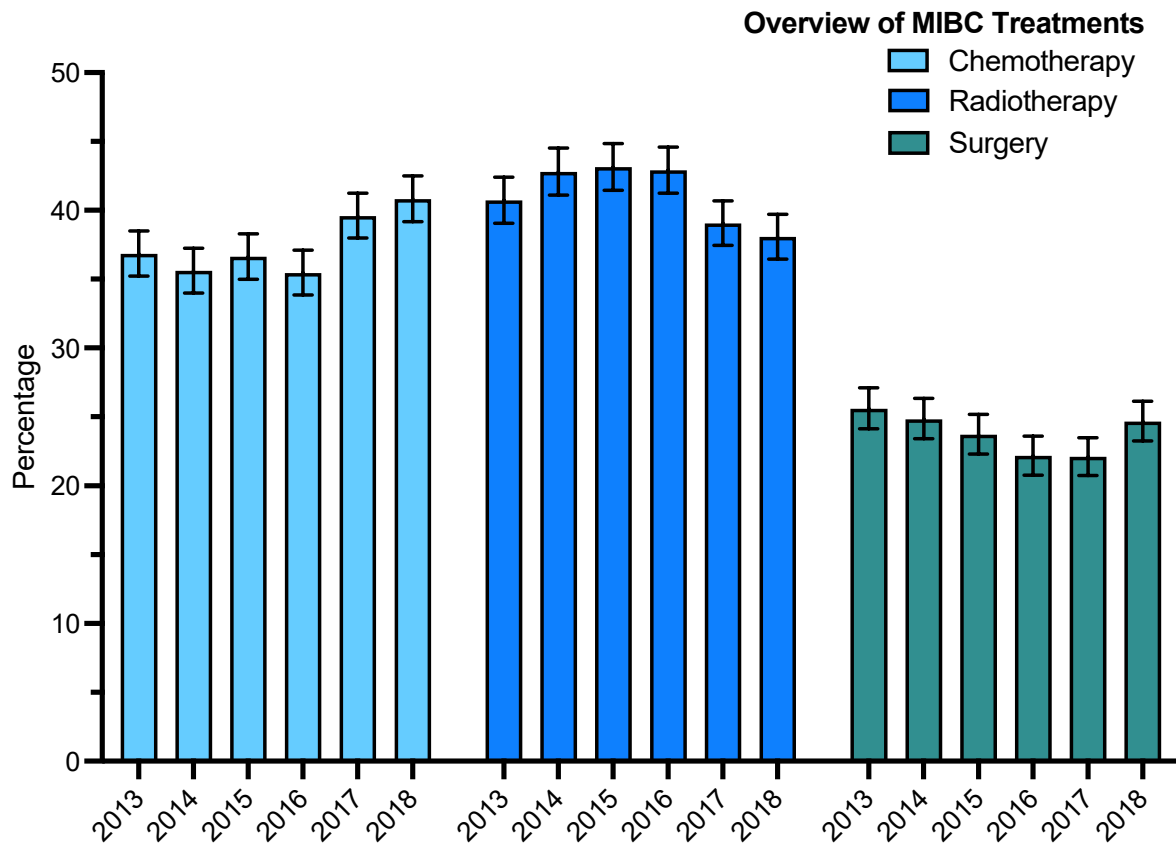

**Supplementary figure 3. An overview of the use of chemotherapy, radiotherapy and radical surgery in patients with invasive bladder cancer from 2013 to 2018. Percentage of patients receiving one or more of each treatment shown.**

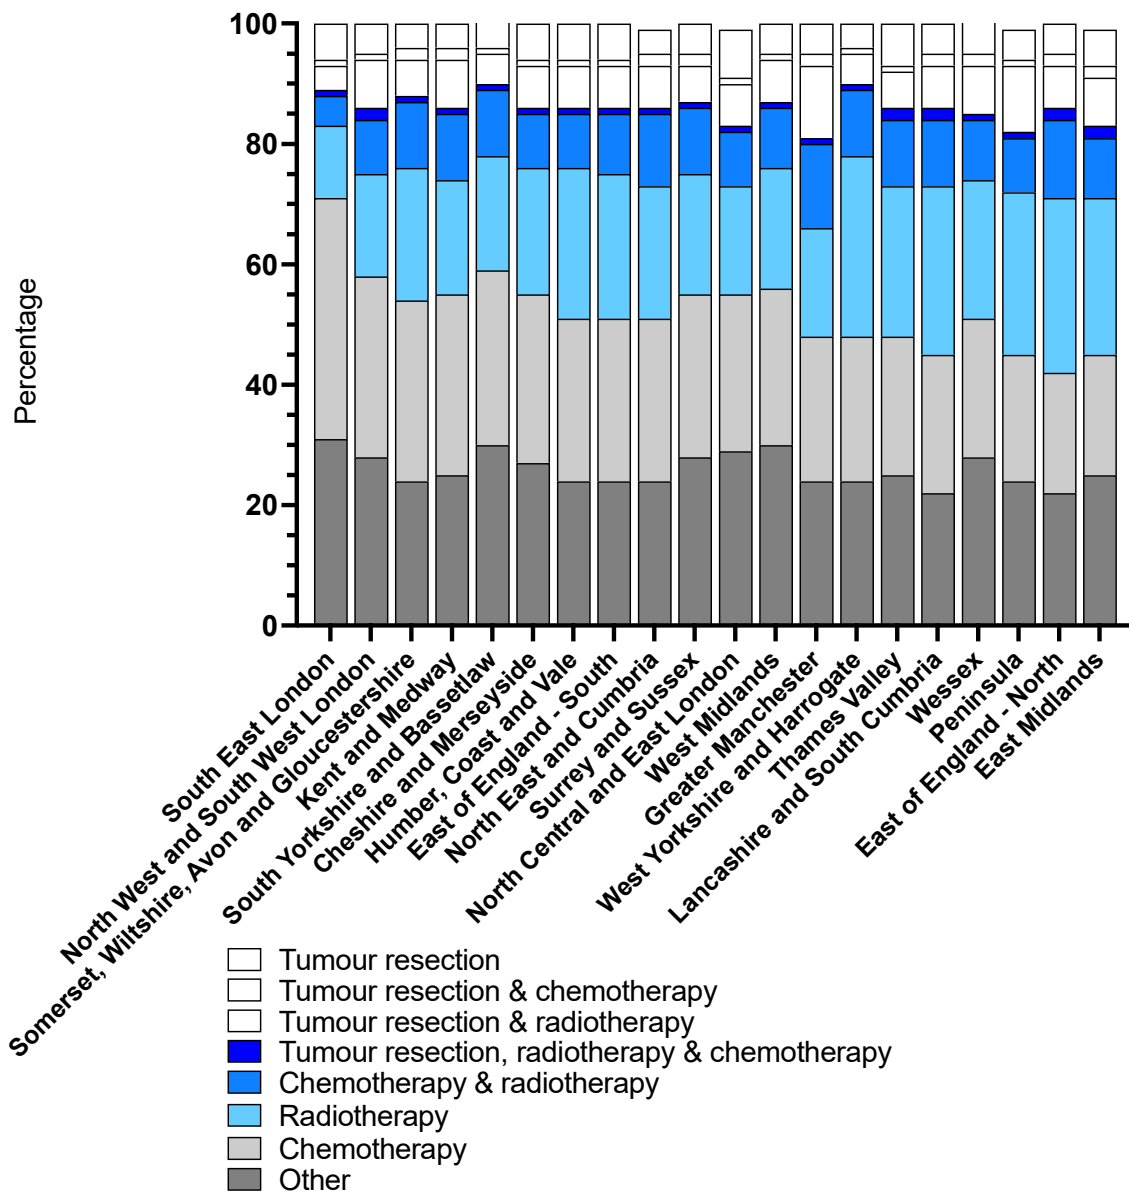

**Supplementary figure 4. Use of chemotherapy, radiotherapy, surgery in isolation and combination in patients with bladder cancer from 2013 to 2018 according to cancer alliance.**

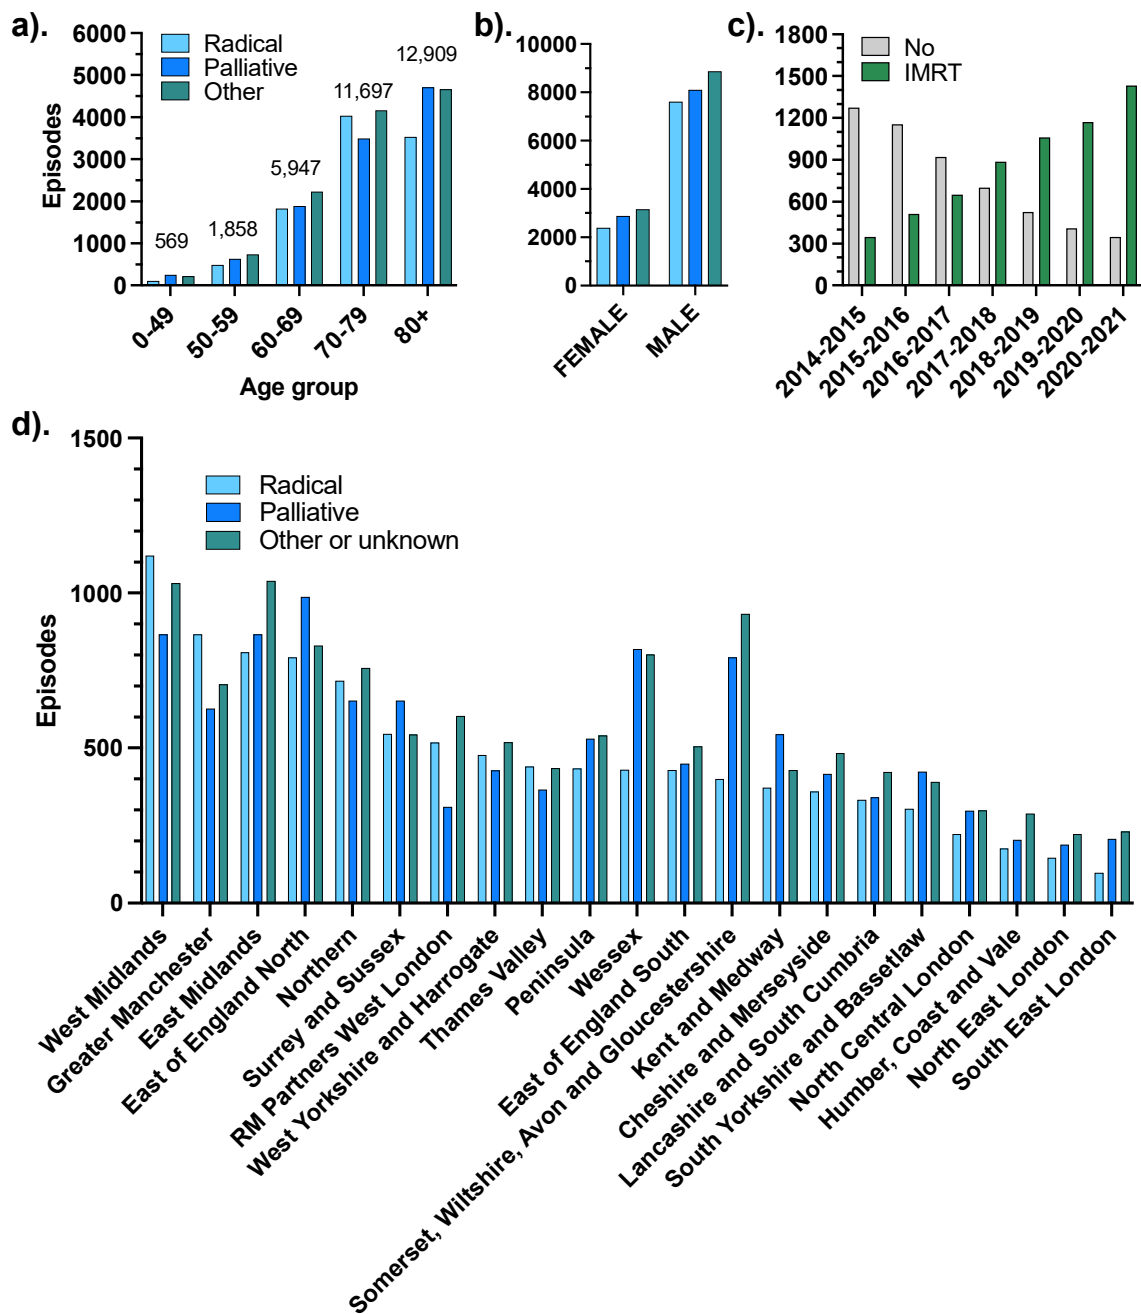

**Supplementary figure 5. Patterns of radiotherapy use for advanced Bladder cancer.**

Radiotherapy regimens for patients with BC from 2009 to 2021 stratified by a). patient age and b). sex, c). The proportion of treatments using intensity modulated radiotherapy for years from 2014 to 2021, d). Use of radical, palliative and other radiotherapy regimens from 2009-2021 according to each NHS cancer alliance.

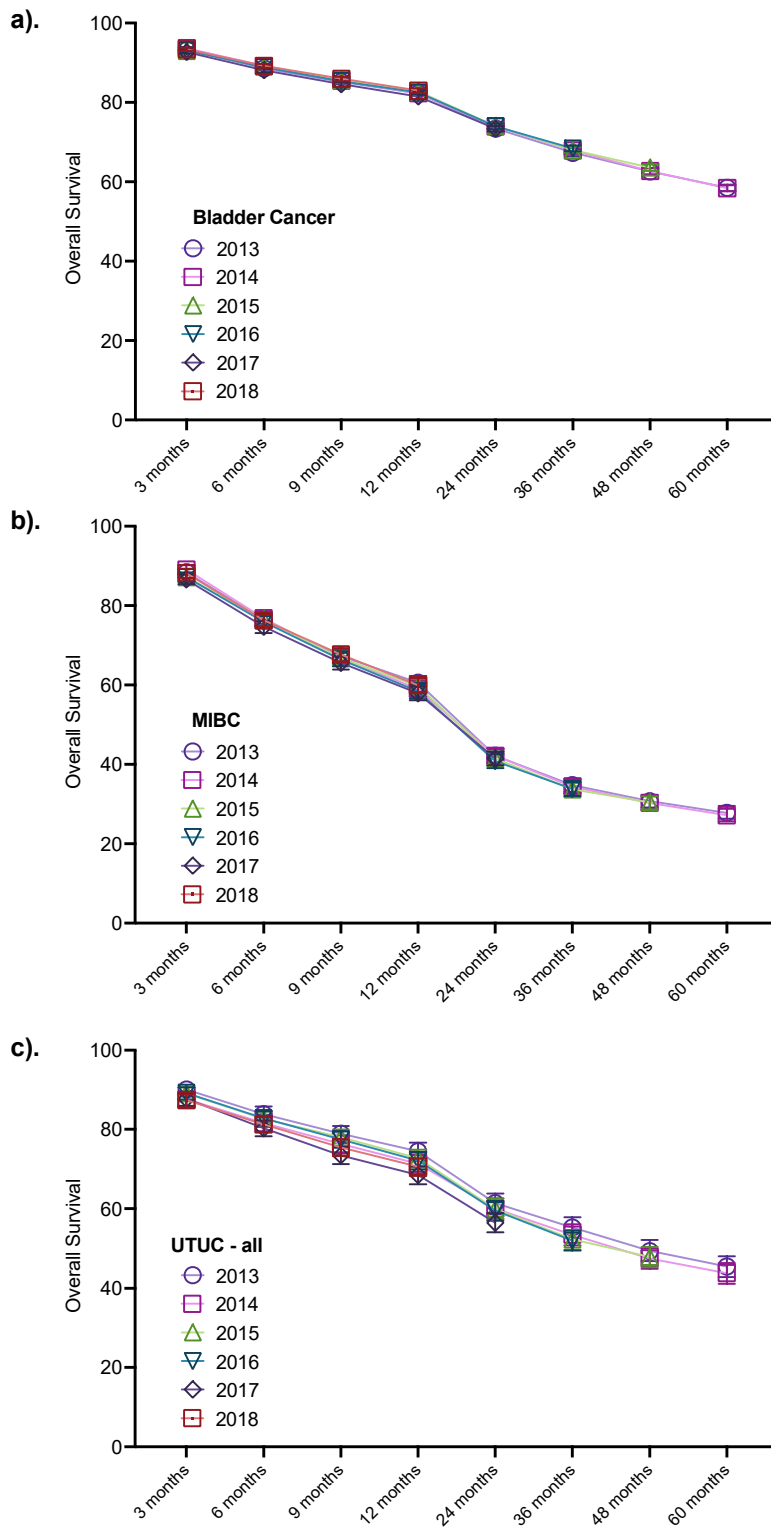

**Supplementary figure 6. Overall survival for a). all urothelial bladder cancers, b). urothelial muscle invasive bladder cancers, and c). all upper tract urothelial cancers according to the year of diagnosis from 2013 to 2018.**



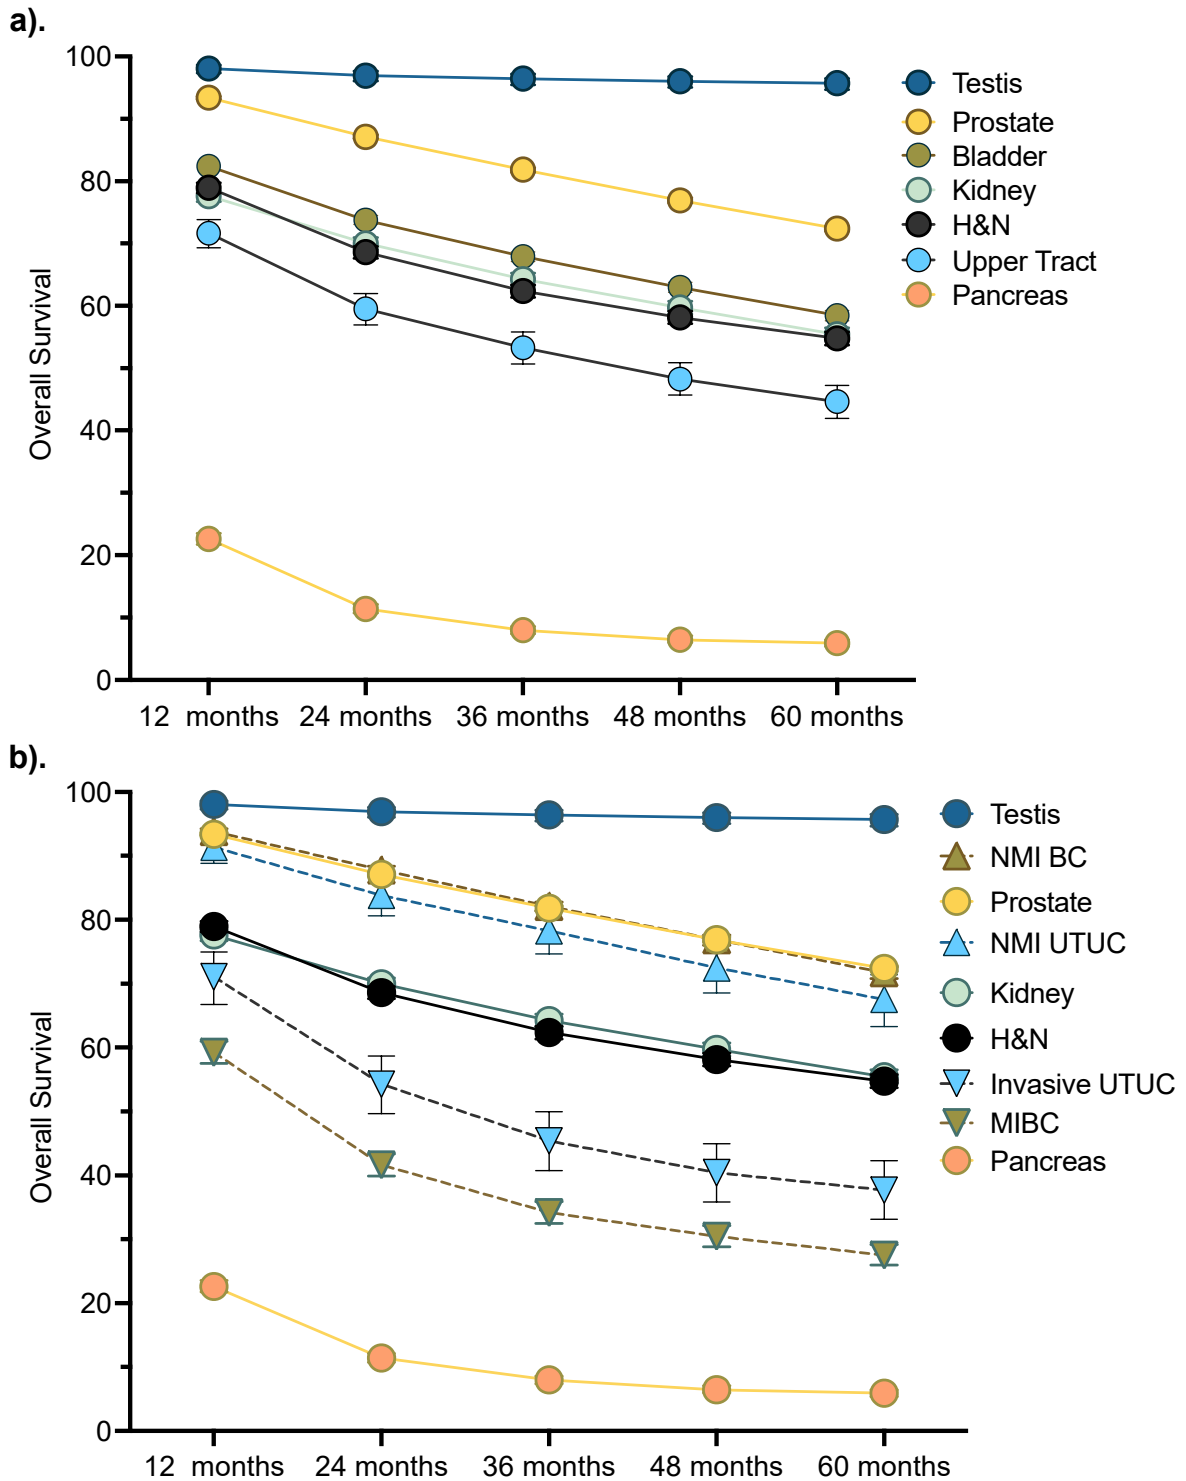

**Supplementary figure 7. Average survival rates from 2013 to 2018 for a). common cancers (in b). BC and UTUC are sub-stratified by stage) within the National Cancer Registration and Analysis Service Data Repository.**

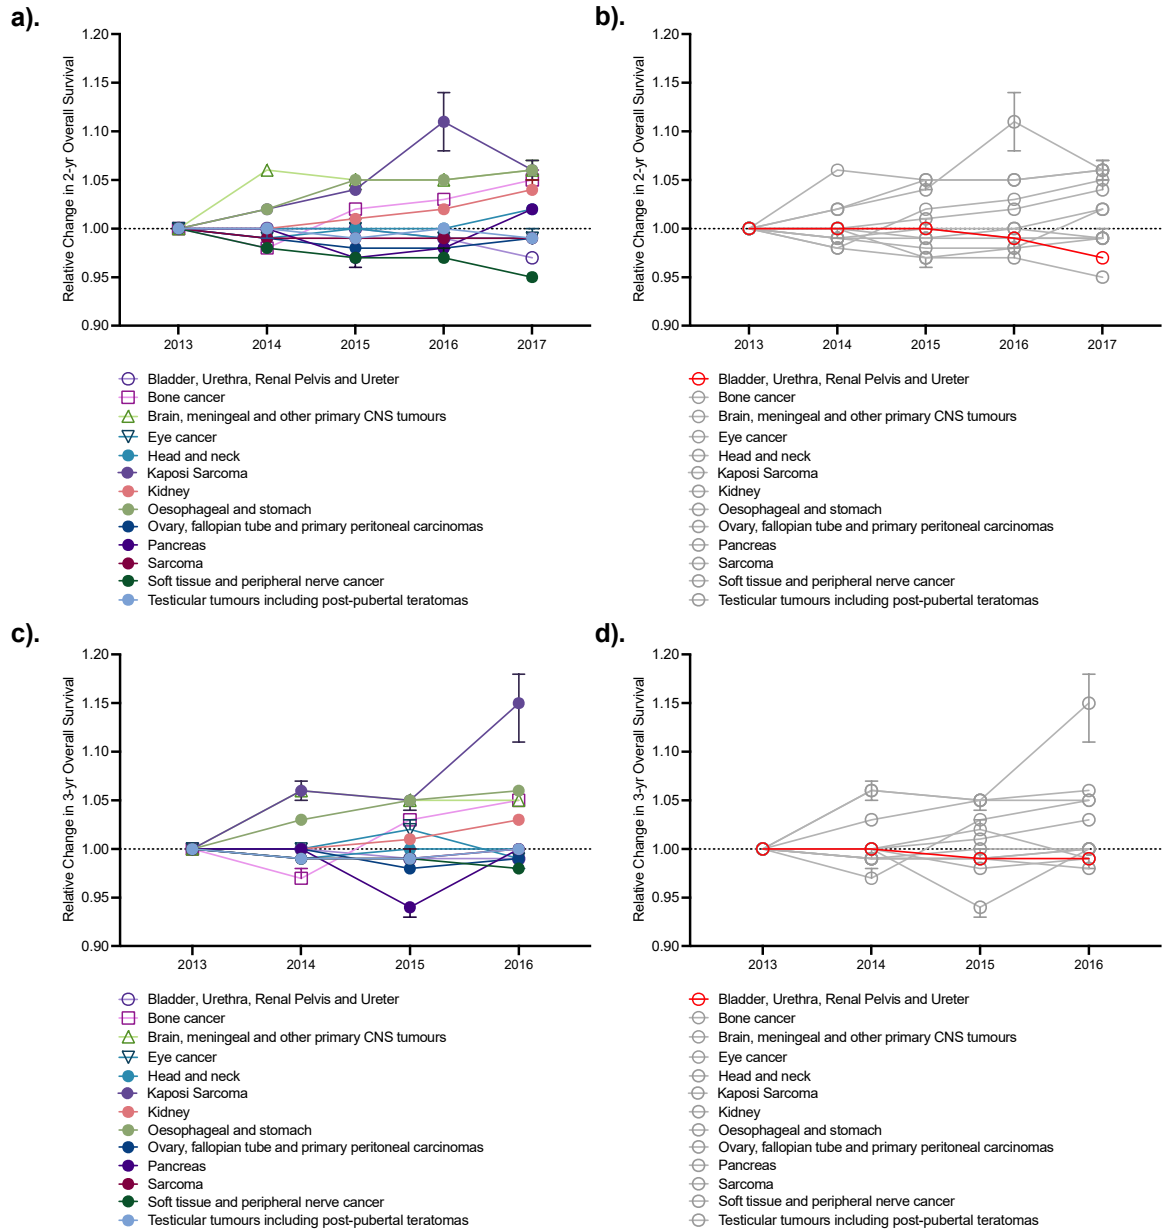

**Supplementary figure 8. Trends in overall survival for multiple cancers since 2013.** For each cancer, the relative survival at 2-years (a. and b.) and 3-years (c. and d.) after diagnosis are shown for the years 2013 to 2018. For illustrative purposes, graphs are duplicated with all cancers coloured (a. and c.) or highlight to show bladder cancer (b. and d.).

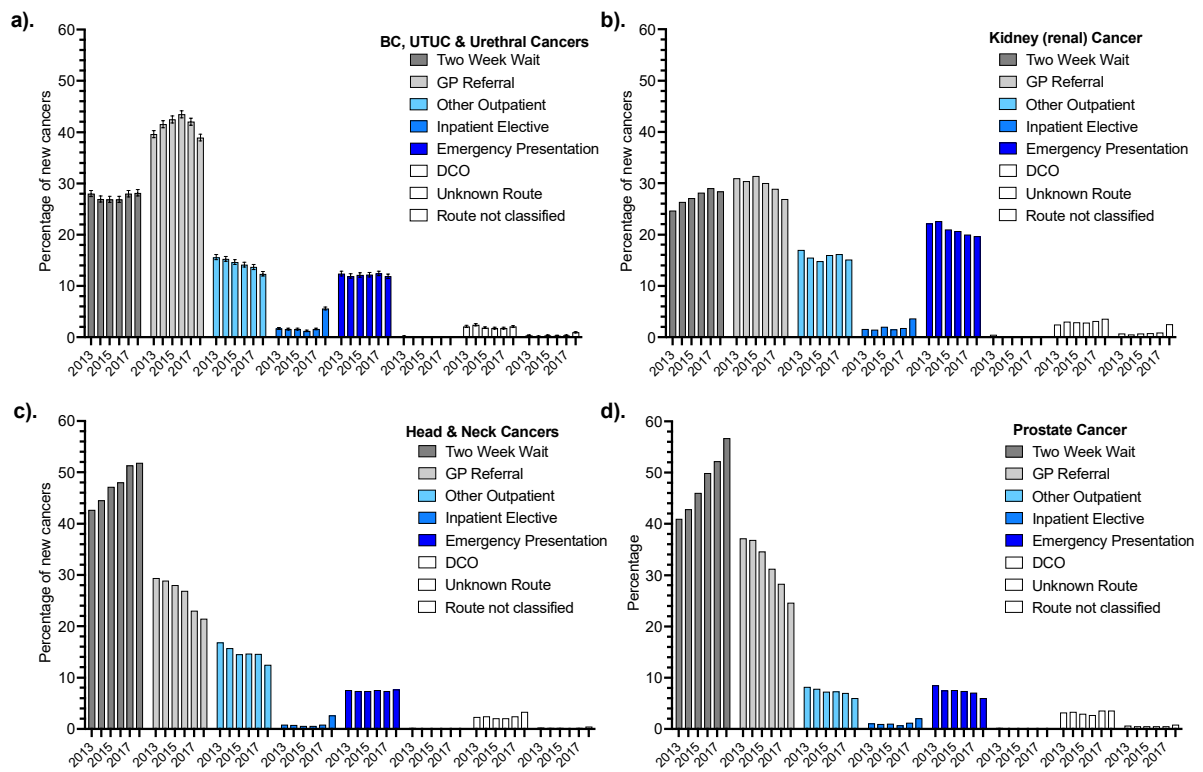

### Death Certification Diagnosis

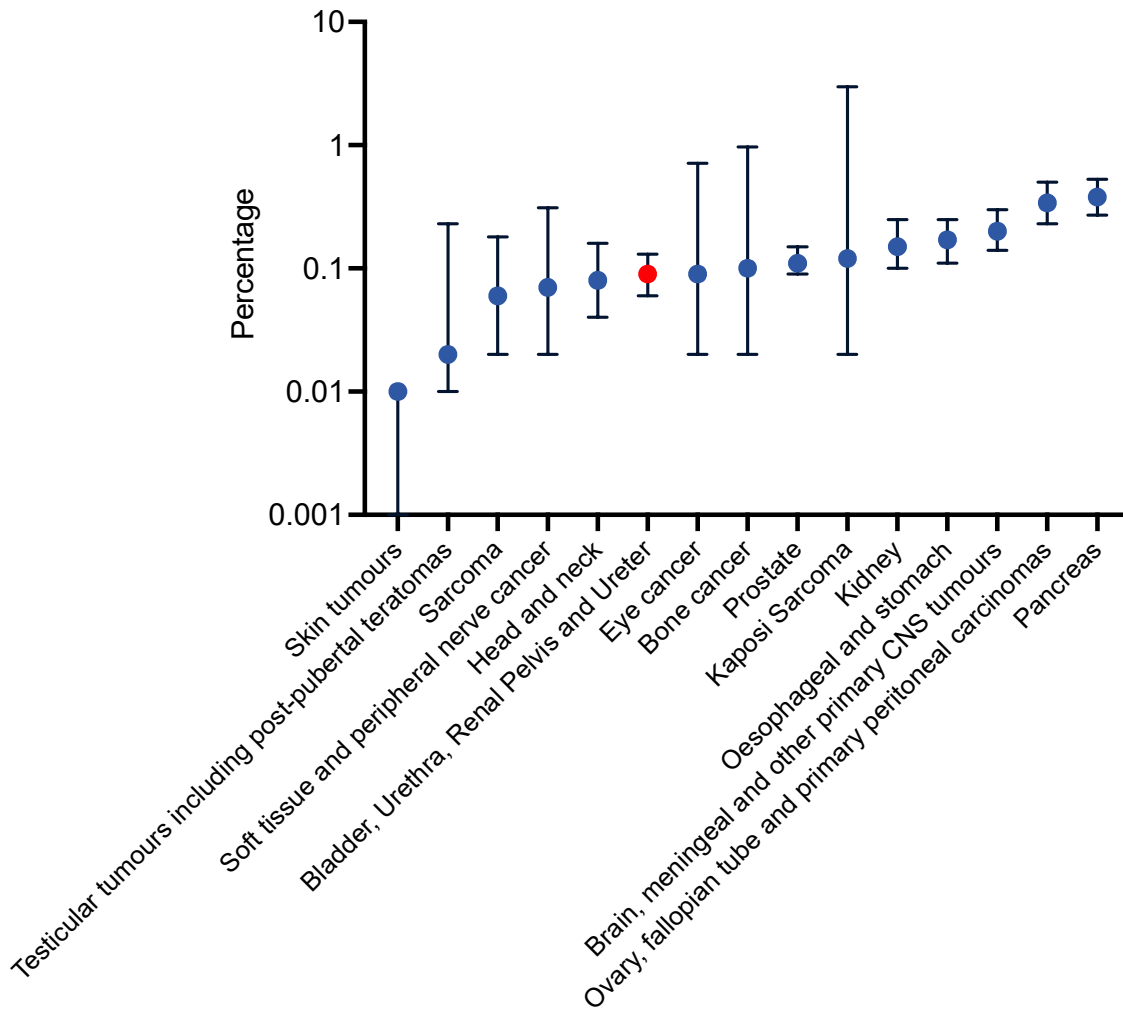

Supplementary figure 10. Rates of certification through death certification diagnosis.

| NMI BC                                                    | Number of NMI BC cases |        |     |             |        |     |                  |        |     |                    |        |    |                        |        | Death Certificate Only |                        |        |    |         |        |    |    |
|-----------------------------------------------------------|------------------------|--------|-----|-------------|--------|-----|------------------|--------|-----|--------------------|--------|----|------------------------|--------|------------------------|------------------------|--------|----|---------|--------|----|----|
|                                                           | Two Week Wait          | 95% CI |     | GP referral | 95% CI |     | Other Outpatient | 95% CI |     | Inpatient Elective | 95% CI |    | Emergency presentation | 95% CI |                        | Death Certificate Only | 95% CI |    | Unknown | 95% CI |    |    |
| Cheshire and Merseyside                                   | 1,918                  | 18%    | 17% | 20%         | 52%    | 50% | 54%              | 21%    | 19% | 23%                | 1%     | 1% | 2%                     | 7%     | 6%                     | 8%                     |        |    |         | 1%     | 1% | 2% |
| East Midlands                                             | 3,583                  | 24%    | 23% | 25%         | 48%    | 47% | 50%              | 20%    | 19% | 22%                | 1%     | 1% | 2%                     | 4%     | 4%                     | 5%                     |        |    |         | 2%     | 1% | 2% |
| East of England                                           | 5,563                  | 25%    | 24% | 26%         | 51%    | 50% | 53%              | 12%    | 12% | 13%                | 3%     | 3% | 4%                     | 5%     | 5%                     | 6%                     |        |    |         | 3%     | 3% | 4% |
| Greater Manchester                                        | 2,895                  | 16%    | 14% | 17%         | 56%    | 54% | 58%              | 17%    | 16% | 19%                | 2%     | 2% | 3%                     | 8%     | 7%                     | 9%                     |        |    |         | 1%     | 1% | 2% |
| Humber, Coast and Vale                                    | 1,366                  | 12%    | 10% | 14%         | 66%    | 64% | 69%              | 11%    | 10% | 13%                | 3%     | 2% | 4%                     | 6%     | 5%                     | 7%                     |        |    |         | 2%     | 1% | 3% |
| Kent and Medway                                           | 2,086                  | 19%    | 17% | 20%         | 43%    | 41% | 45%              | 20%    | 18% | 22%                | 10%    | 8% | 11%                    | 6%     | 5%                     | 7%                     |        |    |         | 3%     | 2% | 4% |
| Lancashire and South Cumbria                              | 1,938                  | 20%    | 18% | 22%         | 53%    | 51% | 56%              | 14%    | 13% | 16%                | 4%     | 3% | 4%                     | 7%     | 6%                     | 9%                     |        |    |         | 2%     | 1% | 2% |
| North Central and North East London                       | 2,488                  | 24%    | 23% | 26%         | 44%    | 42% | 46%              | 15%    | 13% | 16%                | 4%     | 3% | 5%                     | 10%    | 9%                     | 11%                    |        |    |         | 4%     | 3% | 5% |
| North East and Cumbria                                    | 3,066                  | 14%    | 13% | 15%         | 62%    | 60% | 64%              | 15%    | 14% | 16%                | 3%     | 3% | 4%                     | 5%     | 4%                     | 6%                     |        |    |         | 1%     | 1% | 2% |
| North West and South West London                          | 3,028                  | 16%    | 15% | 17%         | 52%    | 51% | 54%              | 16%    | 15% | 18%                | 1%     | 1% | 2%                     | 10%    | 9%                     | 11%                    |        |    |         | 4%     | 4% | 5% |
| Peninsula                                                 | 1,680                  | 12%    | 11% | 14%         | 60%    | 57% | 62%              | 20%    | 18% | 22%                | 3%     | 2% | 4%                     | 4%     | 3%                     | 5%                     |        |    |         | 1%     | 1% | 2% |
| Somerset, Wiltshire, Avon and Gloucestershire             | 2,571                  | 17%    | 16% | 19%         | 56%    | 54% | 58%              | 19%    | 17% | 20%                | 2%     | 1% | 2%                     | 5%     | 4%                     | 6%                     |        |    |         | 2%     | 2% | 3% |
| South East London                                         | 1,382                  | 14%    | 13% | 16%         | 55%    | 53% | 58%              | 15%    | 14% | 17%                | 2%     | 1% | 3%                     | 8%     | 7%                     | 10%                    |        |    |         | 4%     | 4% | 6% |
| South Yorkshire, Bassetlaw, North Derbyshire and Hardwick | 1,636                  | 18%    | 16% | 20%         | 60%    | 57% | 62%              | 14%    | 13% | 16%                | 1%     | 1% | 2%                     | 6%     | 5%                     | 8%                     |        |    |         | 0%     | 0% | 1% |
| Surrey and Sussex                                         | 4,716                  | 17%    | 16% | 19%         | 56%    | 55% | 58%              | 13%    | 12% | 14%                | 3%     | 3% | 4%                     | 6%     | 5%                     | 7%                     | 0%     | 0% |         | 4%     | 3% | 4% |
| Thames Valley                                             | 1,716                  | 24%    | 22% | 26%         | 41%    | 39% | 43%              | 23%    | 21% | 25%                | 4%     | 3% | 5%                     | 4%     | 3%                     | 5%                     |        |    |         | 5%     | 4% | 6% |
| Wessex                                                    | 2,304                  | 27%    | 25% | 29%         | 36%    | 34% | 38%              | 22%    | 20% | 23%                | 9%     | 8% | 10%                    | 5%     | 4%                     | 6%                     |        |    |         | 2%     | 2% | 3% |
| West Midlands                                             | 4,561                  | 23%    | 22% | 24%         | 52%    | 50% | 53%              | 15%    | 14% | 16%                | 1%     | 1% | 2%                     | 6%     | 5%                     | 7%                     |        |    |         | 2%     | 2% | 3% |
| West Yorkshire and Harrogate                              | 2,074                  | 15%    | 13% | 17%         | 60%    | 58% | 62%              | 12%    | 11% | 14%                | 2%     | 2% | 3%                     | 8%     | 7%                     | 10%                    |        |    |         | 2%     | 2% | 3% |
| England                                                   | 50,571                 | 19%    | 19% | 20%         | 53%    | 52% | 53%              | 16%    | 16% | 17%                | 3%     | 3% | 3%                     | 6%     | 6%                     | 7%                     | 0%     | 0% | 0%      | 3%     | 2% | 3% |
| MIBC                                                      | Number of MIBC cases   |        |     |             |        |     |                  |        |     |                    |        |    |                        |        | Death Certificate Only |                        |        |    |         |        |    |    |
|                                                           | Two Week Wait          | 95% CI |     | GP referral | 95% CI |     | Other Outpatient | 95% CI |     | Inpatient Elective | 95% CI |    | Emergency presentation | 95% CI |                        | Death Certificate Only | 95% CI |    | Unknown | 95% CI |    |    |
| Cheshire and Merseyside                                   | 5,084                  | 32%    | 31% | 34%         | 30%    | 29% | 31%              | 15%    | 14% | 16%                | 2%     | 2% | 3%                     | 17%    | 16%                    | 18%                    | 0%     | 0% | 1%      | 2%     | 2% | 3% |
| East Midlands                                             | 7,400                  | 40%    | 39% | 41%         | 24%    | 23% | 25%              | 15%    | 15% | 16%                | 2%     | 2% | 3%                     | 17%    | 16%                    | 18%                    | 0%     | 0% | 0%      | 2%     | 2% | 2% |
| East of England                                           | 11,429                 | 36%    | 35% | 37%         | 29%    | 29% | 30%              | 11%    | 11% | 12%                | 3%     | 2% | 3%                     | 17%    | 17%                    | 18%                    | 0%     | 0% | 0%      | 3%     | 3% | 4% |
| Greater Manchester                                        | 4,932                  | 30%    | 29% | 31%         | 33%    | 31% | 34%              | 13%    | 13% | 14%                | 2%     | 2% | 2%                     | 20%    | 19%                    | 22%                    | 0%     | 0% | 0%      | 2%     | 1% | 2% |
| Humber, Coast and Vale                                    | 3,054                  | 30%    | 29% | 32%         | 40%    | 38% | 41%              | 7%     | 7%  | 8%                 | 5%     | 4% | 6%                     | 16%    | 14%                    | 17%                    | 0%     | 0% | 0%      | 2%     | 2% | 3% |
| Kent and Medway                                           | 3,653                  | 36%    | 35% | 38%         | 24%    | 23% | 26%              | 14%    | 13% | 15%                | 3%     | 3% | 4%                     | 19%    | 17%                    | 20%                    | 1%     | 1% | 1%      | 3%     | 2% | 4% |
| Lancashire and South Cumbria                              | 3,812                  | 40%    | 38% | 41%         | 25%    | 24% | 26%              | 13%    | 12% | 14%                | 4%     | 3% | 4%                     | 18%    | 16%                    | 19%                    | 0%     | 0% | 0%      | 2%     | 1% | 2% |
| North Central and North East London                       | 3,540                  | 27%    | 25% | 28%         | 30%    | 28% | 31%              | 12%    | 11% | 13%                | 3%     | 2% | 3%                     | 24%    | 23%                    | 26%                    | 1%     | 0% | 1%      | 4%     | 3% | 4% |
| North East and Cumbria                                    | 6,255                  | 42%    | 41% | 43%         | 25%    | 24% | 26%              | 12%    | 11% | 13%                | 3%     | 3% | 3%                     | 17%    | 16%                    | 18%                    | 0%     | 0% | 0%      | 1%     | 1% | 2% |
| North West and South West London                          | 4,141                  | 29%    | 27% | 30%         | 31%    | 30% | 33%              | 12%    | 11% | 13%                | 2%     | 1% | 2%                     | 21%    | 20%                    | 23%                    | 1%     | 1% | 1%      | 5%     | 4% | 6% |
| Peninsula                                                 | 3,668                  | 41%    | 40% | 43%         | 24%    | 23% | 26%              | 14%    | 13% | 15%                | 3%     | 2% | 3%                     | 16%    | 15%                    | 17%                    | 0%     | 0% | 1%      | 2%     | 1% | 2% |
| Somerset, Wiltshire, Avon and Gloucestershire             | 5,294                  | 39%    | 37% | 40%         | 26%    | 25% | 28%              | 12%    | 12% | 13%                | 2%     | 2% | 3%                     | 17%    | 16%                    | 18%                    | 0%     | 0% | 1%      | 3%     | 3% | 3% |
| South East London                                         | 2,199                  | 29%    | 27% | 31%         | 33%    | 31% | 35%              | 11%    | 10% | 13%                | 1%     | 1% | 2%                     | 22%    | 20%                    | 24%                    | 0%     | 0% | 1%      | 3%     | 2% | 3% |
| South Yorkshire, Bassetlaw, North Derbyshire and Hardwick | 3,448                  | 38%    | 37% | 40%         | 24%    | 23% | 26%              | 16%    | 15% | 17%                | 2%     | 2% | 3%                     | 18%    | 17%                    | 20%                    | 0%     | 0% | 1%      | 1%     | 1% | 2% |
| Surrey and Sussex                                         | 5,628                  | 35%    | 34% | 36%         | 30%    | 29% | 31%              | 10%    | 10% | 11%                | 3%     | 2% | 3%                     | 18%    | 17%                    | 19%                    | 0%     | 0% | 1%      | 4%     | 4% | 5% |
| Thames Valley                                             | 3,572                  | 41%    | 40% | 43%         | 22%    | 20% | 23%              | 13%    | 12% | 14%                | 5%     | 5% | 6%                     | 15%    | 14%                    | 16%                    | 0%     | 0% | 1%      | 4%     | 3% | 5% |
| Wessex                                                    | 5,063                  | 36%    | 34% | 37%         | 24%    | 23% | 25%              | 14%    | 13% | 15%                | 6%     | 5% | 7%                     | 17%    | 16%                    | 19%                    | 0%     | 0% | 1%      | 3%     | 2% | 3% |
| West Midlands                                             | 9,892                  | 40%    | 39% | 41%         | 27%    | 27% | 28%              | 11%    | 10% | 11%                | 1%     | 1% | 2%                     | 18%    | 18%                    | 19%                    | 0%     | 0% | 0%      | 2%     | 2% | 3% |
| West Yorkshire and Harrogate                              | 4,462                  | 37%    | 36% | 39%         | 26%    | 24% | 27%              | 9%     | 8%  | 10%                | 4%     | 3% | 4%                     | 21%    | 20%                    | 23%                    | 0%     | 0% | 0%      | 3%     | 3% | 4% |
| England                                                   | 96,526                 | 36%    | 36% | 37%         | 28%    | 27% | 28%              | 12%    | 12% | 13%                | 3%     | 3% | 3%                     | 18%    | 18%                    | 18%                    | 0%     | 0% | 0%      | 3%     | 3% | 3% |

Supplementary table 1. Routes to diagnosis for NMIBC and MIBC for each cancer alliance (from <https://www.cancerdata.nhs.uk/routestodiagnosis/index>).

| Year | Tumour Type             | Tumour Type 3 | Stage               | Stage Detail | Incidence (case number) | Chemotherapy (CT) only percentage | CT only percentage LO | CT only percentage UCI | Radiotherapy (RT) only percentage | RT only percentage LO | RT only percentage UCI | Surgery only percentage | Surgery only percentage LO | Surgery only percentage UCI | CT and RT percentage | CT and RT percentage LO | CT and RT percentage UCI | Surgery and CT percentage | Surgery and CT percentage LO | Surgery and CT percentage UCI | Surgery and RT percentage | Surgery and RT percentage LO | Surgery and RT percentage UCI | Surgery and CT and RT percentage | Surgery and CT and RT percentage LO | Surgery and CT and RT percentage UCI | Other care percentage | Other care percentage LO | Other care percentage UCI |       |
|------|-------------------------|---------------|---------------------|--------------|-------------------------|-----------------------------------|-----------------------|------------------------|-----------------------------------|-----------------------|------------------------|-------------------------|----------------------------|-----------------------------|----------------------|-------------------------|--------------------------|---------------------------|------------------------------|-------------------------------|---------------------------|------------------------------|-------------------------------|----------------------------------|-------------------------------------|--------------------------------------|-----------------------|--------------------------|---------------------------|-------|
| 2013 | Renal Pelvis and Ureter | All           | Non-muscle-invasive | T1           | 277                     | 3.6%                              | 2.0%                  | 6.5%                   | 2.2%                              | 1.0%                  | 4.6%                   | 66.8%                   | 61.0%                      | 72.1%                       | 0.4%                 | 0.1%                    | 2.0%                     | 5.4%                      | 3.3%                         | 8.7%                          | 1.8%                      | 0.8%                         | 4.2%                          | 0.0%                             | 0.0%                                | 1.4%                                 | 19.9%                 | 15.6%                    | 25.0%                     |       |
| 2013 | Renal Pelvis and Ureter | All           | Muscle-invasive     | All          | 644                     | 2.5%                              | 1.5%                  | 4.0%                   | 1.1%                              | 0.5%                  | 2.2%                   | 58.2%                   | 54.4%                      | 62.0%                       | 0.9%                 | 0.4%                    | 2.0%                     | 15.4%                     | 12.8%                        | 18.4%                         | 4.2%                      | 2.9%                         | 6.0%                          | 2.8%                             | 1.8%                                | 4.4%                                 | 14.9%                 | 12.4%                    | 17.9%                     |       |
| 2013 | Renal Pelvis and Ureter | All           | Stage unknown       | All          | 485                     | 9.9%                              | 7.5%                  | 12.9%                  | 8.7%                              | 6.5%                  | 11.1%                  | 8.6%                    | 14.2%                      | 2.5%                        | 1.4%                 | 4.3%                    | 2.7%                     | 1.6%                      | 4.5%                         | 0.6%                          | 0.2%                      | 1.8%                         | 0.2%                          | 0.0%                             | 1.2%                                | 64.3%                                | 60.0%                 | 68.5%                    |                           |       |
| 2013 | Bladder                 | Urothelial    | Non-muscle-invasive | T1           | 3599                    | 1.3%                              | 1.0%                  | 1.7%                   | 0.6%                              | 0.4%                  | 0.9%                   | 50.9%                   | 49.3%                      | 52.5%                       | 0.1%                 | 0.1%                    | 0.3%                     | 39.5%                     | 37.9%                        | 41.1%                         | 2.8%                      | 2.3%                         | 3.4%                          | 1.9%                             | 1.5%                                | 2.4%                                 | 2.9%                  | 2.4%                     | 3.5%                      |       |
| 2013 | Bladder                 | Urothelial    | Muscle-invasive     | All          | 3290                    | 7.6%                              | 6.8%                  | 8.6%                   | 22.2%                             | 20.8%                 | 23.7%                  | 11.9%                   | 10.8%                      | 13.0%                       | 16.3%                | 15.1%                   | 17.6%                    | 11.6%                     | 10.6%                        | 12.8%                         | 0.9%                      | 0.6%                         | 1.3%                          | 1.2%                             | 0.9%                                | 1.7%                                 | 28.2%                 | 26.7%                    | 29.8%                     |       |
| 2013 | Bladder                 | Urothelial    | Stage unknown       | All          | 1490                    | 8.7%                              | 7.3%                  | 10.2%                  | 6.8%                              | 5.7%                  | 8.2%                   | 1.1%                    | 0.7%                       | 1.8%                        | 2.6%                 | 1.9%                    | 3.5%                     | 1.3%                      | 0.9%                         | 2.1%                          | 0.1%                      | 0.0%                         | 0.4%                          | 0.1%                             | 0.0%                                | 0.5%                                 | 79.3%                 | 77.1%                    | 81.2%                     |       |
| 2013 | Bladder                 | Other         | All stages          | All          | 636                     | 7.2%                              | 5.5%                  | 9.5%                   | 13.2%                             | 10.8%                 | 16.1%                  | 22.6%                   | 19.6%                      | 26.1%                       | 10.7%                | 8.5%                    | 13.3%                    | 7.4%                      | 5.6%                         | 9.7%                          | 2.4%                      | 1.4%                         | 3.9%                          | 2.2%                             | 1.3%                                | 3.7%                                 | 34.3%                 | 30.7%                    | 38.1%                     |       |
| 2013 | Bladder                 | Other         | Non-muscle-invasive | All          | 414                     | 8.0%                              | 5.7%                  | 11.0%                  | 14.7%                             | 11.6%                 | 18.5%                  | 23.4%                   | 19.6%                      | 27.7%                       | 14.0%                | 11.0%                   | 17.7%                    | 7.5%                      | 5.3%                         | 10.4%                         | 2.2%                      | 1.1%                         | 4.1%                          | 1.2%                             | 0.5%                                | 2.8%                                 | 29.0%                 | 24.8%                    | 33.5%                     |       |
| 2013 | Bladder                 | Other         | Stage unknown       | All          | 134                     | 9.0%                              | 5.2%                  | 15.0%                  | 17.2%                             | 11.7%                 | 24.4%                  | 7.5%                    | 4.1%                       | 13.2%                       | 7.5%                 | 4.1%                    | 13.2%                    | 2.2%                      | 0.8%                         | 6.4%                          | 0.0%                      | 0.0%                         | 2.8%                          | 0.7%                             | 0.1%                                | 4.1%                                 | 56.0%                 | 47.5%                    | 64.1%                     |       |
| 2014 | Renal Pelvis and Ureter | All           | Non-muscle-invasive | T1           | 299                     | 3.0%                              | 1.6%                  | 5.6%                   | 0.0%                              | 0.0%                  | 1.3%                   | 64.5%                   | 59.0%                      | 69.8%                       | 0.7%                 | 0.2%                    | 2.4%                     | 7.4%                      | 4.9%                         | 10.9%                         | 0.7%                      | 0.2%                         | 2.4%                          | 0.0%                             | 0.0%                                | 1.3%                                 | 23.7%                 | 19.3%                    | 28.9%                     |       |
| 2014 | Renal Pelvis and Ureter | All           | Muscle-invasive     | All          | 673                     | 5.7%                              | 1.6%                  | 4.0%                   | 1.5%                              | 0.8%                  | 1.4%                   | 56.6%                   | 52.8%                      | 60.3%                       | 2.1%                 | 1.2%                    | 3.5%                     | 17.1%                     | 14.4%                        | 20.1%                         | 3.3%                      | 2.2%                         | 4.9%                          | 2.5%                             | 1.6%                                | 4.0%                                 | 14.4%                 | 12.0%                    | 17.3%                     |       |
| 2014 | Renal Pelvis and Ureter | All           | Stage unknown       | All          | 443                     | 7.9%                              | 5.7%                  | 10.8%                  | 8.4%                              | 6.1%                  | 11.3%                  | 9.5%                    | 7.1%                       | 12.6%                       | 4.7%                 | 3.1%                    | 7.1%                     | 0.9%                      | 0.4%                         | 2.3%                          | 0.2%                      | 0.0%                         | 1.3%                          | 0.2%                             | 0.3%                                | 1.3%                                 | 68.2%                 | 63.7%                    | 72.3%                     |       |
| 2014 | Bladder                 | Urothelial    | Non-muscle-invasive | T1           | 3667                    | 1.0%                              | 0.8%                  | 1.4%                   | 0.3%                              | 0.2%                  | 0.6%                   | 52.0%                   | 50.3%                      | 53.6%                       | 0.1%                 | 0.0%                    | 0.2%                     | 37.9%                     | 36.3%                        | 39.5%                         | 3.2%                      | 2.3%                         | 3.4%                          | 1.7%                             | 1.3%                                | 2.2%                                 | 4.2%                  | 3.6%                     | 4.9%                      |       |
| 2014 | Bladder                 | Urothelial    | Muscle-invasive     | All          | 3264                    | 7.1%                              | 6.3%                  | 8.1%                   | 25.4%                             | 24.0%                 | 27.0%                  | 11.2%                   | 10.1%                      | 12.3%                       | 15.6%                | 14.4%                   | 16.8%                    | 11.9%                     | 10.8%                        | 13.0%                         | 0.8%                      | 0.5%                         | 1.2%                          | 1.0%                             | 0.7%                                | 1.4%                                 | 27.0%                 | 25.5%                    | 28.6%                     |       |
| 2014 | Bladder                 | Urothelial    | Stage unknown       | All          | 1186                    | 7.2%                              | 5.8%                  | 8.8%                   | 5.9%                              | 4.7%                  | 7.4%                   | 0.8%                    | 0.4%                       | 1.4%                        | 2.0%                 | 1.5%                    | 3.2%                     | 0.8%                      | 0.4%                         | 1.4%                          | 0.0%                      | 0.0%                         | 0.3%                          | 0.2%                             | 0.0%                                | 0.6%                                 | 83.1%                 | 80.8%                    | 85.1%                     |       |
| 2014 | Bladder                 | Other         | All stages          | All          | 617                     | 6.2%                              | 4.5%                  | 8.3%                   | 11.8%                             | 9.5%                  | 14.6%                  | 26.1%                   | 22.8%                      | 29.7%                       | 10.0%                | 9.7%                    | 14.8%                    | 6.5%                      | 4.8%                         | 8.7%                          | 3.6%                      | 2.4%                         | 5.3%                          | 2.4%                             | 1.5%                                | 4.0%                                 | 31.4%                 | 27.9%                    | 35.2%                     |       |
| 2014 | Bladder                 | Other         | Non-muscle-invasive | All          | 391                     | 5.4%                              | 3.5%                  | 8.1%                   | 14.8%                             | 11.7%                 | 18.7%                  | 23.5%                   | 19.6%                      | 28.0%                       | 12.5%                | 12.1%                   | 19.3%                    | 7.2%                      | 5.0%                         | 10.2%                         | 3.3%                      | 2.0%                         | 5.6%                          | 1.3%                             | 0.5%                                | 3.0%                                 | 23.2%                 | 24.9%                    | 33.8%                     |       |
| 2014 | Bladder                 | Other         | Stage unknown       | All          | 122                     | 10.7%                             | 6.3%                  | 17.4%                  | 10.7%                             | 6.3%                  | 17.4%                  | 16.4%                   | 10.9%                      | 24.0%                       | 10.7%                | 6.3%                    | 17.4%                    | 5.3%                      | 0.8%                         | 7.0%                          | 0.8%                      | 0.1%                         | 4.5%                          | 0.8%                             | 0.6%                                | 4.5%                                 | 47.5%                 | 38.9%                    | 56.3%                     |       |
| 2015 | Renal Pelvis and Ureter | All           | Non-muscle-invasive | T1           | 323                     | 2.5%                              | 1.3%                  | 4.8%                   | 0.9%                              | 0.3%                  | 2.7%                   | 65.6%                   | 60.3%                      | 70.6%                       | 0.3%                 | 0.1%                    | 1.7%                     | 7.7%                      | 5.3%                         | 11.2%                         | 0.6%                      | 0.2%                         | 2.2%                          | 0.0%                             | 0.0%                                | 1.2%                                 | 22.3%                 | 18.1%                    | 27.1%                     |       |
| 2015 | Renal Pelvis and Ureter | All           | Muscle-invasive     | All          | 741                     | 3.9%                              | 2.7%                  | 5.6%                   | 1.9%                              | 1.1%                  | 3.1%                   | 54.1%                   | 50.5%                      | 57.7%                       | 1.6%                 | 0.9%                    | 2.8%                     | 16.1%                     | 13.6%                        | 18.9%                         | 3.2%                      | 2.2%                         | 4.8%                          | 3.5%                             | 2.4%                                | 5.1%                                 | 15.7%                 | 13.2%                    | 18.4%                     |       |
| 2015 | Renal Pelvis and Ureter | All           | Stage unknown       | All          | 439                     | 8.9%                              | 6.6%                  | 11.9%                  | 7.5%                              | 5.4%                  | 10.4%                  | 7.1%                    | 5.0%                       | 9.8%                        | 4.3%                 | 2.8%                    | 6.7%                     | 0.7%                      | 0.2%                         | 2.0%                          | 0.5%                      | 0.1%                         | 1.6%                          | 0.2%                             | 0.0%                                | 1.3%                                 | 70.8%                 | 66.4%                    | 74.9%                     |       |
| 2015 | Renal Pelvis and Ureter | All           | Non-muscle-invasive | T1           | 3615                    | 0.9%                              | 0.7%                  | 1.3%                   | 0.2%                              | 0.1%                  | 0.5%                   | 52.0%                   | 50.3%                      | 53.6%                       | 0.1%                 | 0.1%                    | 0.3%                     | 38.8%                     | 37.2%                        | 40.4%                         | 2.8%                      | 2.3%                         | 3.4%                          | 1.9%                             | 1.5%                                | 2.4%                                 | 3.2%                  | 2.7%                     | 3.8%                      |       |
| 2015 | Bladder                 | Urothelial    | Non-muscle-invasive | All          | 3313                    | 7.4%                              | 6.6%                  | 8.3%                   | 25.7%                             | 24.2%                 | 27.2%                  | 10.2%                   | 9.2%                       | 11.3%                       | 16.1%                | 14.9%                   | 17.4%                    | 12.3%                     | 11.2%                        | 13.4%                         | 0.5%                      | 0.3%                         | 0.8%                          | 0.5%                             | 1.1%                                | 27.0%                                | 25.5%                 | 28.6%                    |                           |       |
| 2015 | Bladder                 | Urothelial    | Stage unknown       | All          | 1162                    | 5.9%                              | 4.6%                  | 7.4%                   | 6.8%                              | 5.5%                  | 8.4%                   | 0.3%                    | 0.1%                       | 0.9%                        | 2.2%                 | 1.5%                    | 3.2%                     | 0.3%                      | 0.1%                         | 0.9%                          | 0.0%                      | 0.0%                         | 0.3%                          | 0.2%                             | 0.0%                                | 0.6%                                 | 84.3%                 | 82.1%                    | 86.3%                     |       |
| 2015 | Bladder                 | Other         | All stages          | All          | 618                     | 6.8%                              | 5.1%                  | 8.1%                   | 14.7%                             | 12.1%                 | 17.7%                  | 21.7%                   | 18.6%                      | 25.1%                       | 9.1%                 | 7.6%                    | 12.3%                    | 5.7%                      | 4.1%                         | 7.8%                          | 2.9%                      | 1.9%                         | 4.6%                          | 1.3%                             | 0.7%                                | 2.5%                                 | 37.2%                 | 33.5%                    | 41.1%                     |       |
| 2015 | Bladder                 | Other         | Non-muscle-invasive | All          | 421                     | 7.6%                              | 5.4%                  | 10.5%                  | 18.8%                             | 15.3%                 | 22.8%                  | 20.4%                   | 16.9%                      | 24.5%                       | 12.4%                | 14.2%                   | 9.5%                     | 15.8%                     | 4.3%                         | 2.7%                          | 6.7%                      | 1.9%                         | 1.0%                          | 3.7%                             | 1.4%                                | 0.7%                                 | 3.1%                  | 33.3%                    | 28.9%                     | 37.9% |
| 2015 | Bladder                 | Other         | Stage unknown       | All          | 113                     | 8.0%                              | 4.2%                  | 14.4%                  | 8.9%                              | 4.9%                  | 15.8%                  | 8.0%                    | 4.2%                       | 14.4%                       | 6.2%                 | 3.0%                    | 12.2%                    | 4.4%                      | 1.9%                         | 9.9%                          | 0.0%                      | 0.0%                         | 3.3%                          | 0.9%                             | 0.2%                                | 4.8%                                 | 63.7%                 | 54.5%                    | 72.0%                     |       |
| 2016 | Renal Pelvis and Ureter | All           | Non-muscle-invasive | T1           | 307                     | 2.9%                              | 1.6%                  | 5.5%                   | 1.3%                              | 0.5%                  | 3.3%                   | 63.8%                   | 58.3%                      | 69.0%                       | 0.3%                 | 0.5%                    | 3.3%                     | 7.2%                      | 4.8%                         | 10.6%                         | 0.3%                      | 0.1%                         | 1.8%                          | 0.0%                             | 0.0%                                | 1.2%                                 | 21.1%                 | 18.8%                    | 28.2%                     |       |
| 2016 | Renal Pelvis and Ureter | All           | Muscle-invasive     | All          | 708                     | 4.4%                              | 3.1%                  | 6.1%                   | 1.7%                              | 1.0%                  | 2.9%                   | 54.9%                   | 51.3%                      | 58.6%                       | 1.6%                 | 0.9%                    | 2.8%                     | 20.2%                     | 17.4%                        | 23.3%                         | 3.1%                      | 2.1%                         | 4.7%                          | 1.8%                             | 1.1%                                | 3.1%                                 | 12.3%                 | 10.8%                    | 14.9%                     |       |
| 2016 | Renal Pelvis and Ureter | All           | Stage unknown       | All          | 484                     | 6.0%                              | 4.2%                  | 8.5%                   | 7.2%                              | 5.2%                  | 9.9%                   | 7.9%                    | 5.8%                       | 10.6%                       | 2.9%                 | 1.7%                    | 4.8%                     | 1.0%                      | 0.4%                         | 2.4%                          | 0.8%                      | 0.3%                         | 2.1%                          | 0.0%                             | 0.0%                                | 0.8%                                 | 74.2%                 | 70.1%                    | 77.9%                     |       |
| 2016 | Bladder                 | Urothelial    | Non-muscle-invasive | T1           | 3626                    | 0.9%                              | 0.7%                  | 1.3%                   | 0.2%                              | 0.1%                  | 0.4%                   | 50.6%                   | 49.0%                      | 52.3%                       | 0.1%                 | 0.0%                    | 0.3%                     | 40.2%                     | 38.6%                        | 41.8%                         | 3.0%                      | 2.4%                         | 3.6%                          | 2.0%                             | 1.6%                                | 2.5%                                 | 3.1%                  | 2.5%                     | 3.7%                      |       |
| 2016 | Bladder                 | Urothelial    | Muscle-invasive     | All          | 3333                    | 7.6%                              | 6.7%                  | 8.5%                   | 25.1%                             | 23.7%                 | 26.6%                  | 9.7%                    | 8.7%                       | 10.7%                       | 16.3%                | 15.1%                   | 17.6%                    | 11.0%                     | 10.0%                        | 12.1%                         | 0.8%                      | 0.6%                         | 1.2%                          | 0.7%                             | 0.4%                                | 1.0%                                 | 28.9%                 | 27.4%                    | 30.4%                     |       |
| 2016 | Bladder                 | Urothelial    | Stage unknown       | All          | 1056                    | 6.4%                              | 5.1%                  | 8.1%                   | 5.8%                              | 4.5%                  | 7.4%                   | 1.0%                    | 0.6%                       | 1.9%                        | 1.6%                 | 1.0%                    | 2.6%                     | 0.9%                      | 0.4%                         | 1.6%                          | 0.1%                      | 0.0%                         | 0.5%                          | 0.1%                             | 0.0%                                | 0.5%                                 | 84.1%                 | 81.8%                    | 86.2%                     |       |
| 2016 | Bladder                 | Other         | All stages          | All          | 610                     | 6.2%                              | 4.6%                  | 8.4%                   | 12.0%                             | 9.6%                  | 14.8%                  | 28.9%                   | 25.4%                      | 32.6%                       | 7.2%                 | 7.1%                    | 11.7%                    | 6.6%                      | 4.9%                         | 8.8%                          | 3.6%                      | 2.4%                         | 5.4%                          | 1.5%                             | 0.8%                                | 2.8%                                 | 31.3%                 | 28.9%                    | 35.9%                     |       |
| 2016 | Bladder                 | Other         | Non-muscle-invasive | All          | 398                     | 6.8%                              | 4.7%                  | 9.7%                   | 14.8%                             | 11.7%                 | 18.7%                  | 25.4%                   | 21.4%                      | 29.9%                       | 13.1%                | 10.1%                   | 16.7%                    | 7.0%                      | 4.9%                         | 10.0%                         | 1.5%                      | 0.7%                         | 3.3%                          | 1.0%                             | 0.4%                                | 2.6%                                 | 30.4%                 | 26.1%                    | 35.1%                     |       |
| 2016 | Bladder                 | Other         | Stage unknown       | All          | 109                     | 7.3%                              | 3.8%                  | 13.8%                  | 11.9%                             | 7.1%                  | 19.3%                  | 17.4%                   | 11.5%                      | 25.6%                       | 3.7%                 | 1.4%                    | 9.1%                     | 0.9%                      | 0.2%                         | 5.0%                          | 0.9%                      | 0.2%                         | 5.0%                          | 0.9%                             | 0.2%                                | 5.0%                                 | 56.9%                 | 47.5%                    | 65.8%                     |       |
| 2017 | Renal Pelvis and Ureter | All           | Non-muscle-invasive | T1           | 256                     | 2.3%                              | 1.1%                  | 5.0%                   | 1.6%                              | 0.6%                  | 3.9%                   | 65.2%                   | 59.2%                      | 70.8%                       | 0.8%                 | 0.2%                    | 2.8%                     | 8.2%                      | 5.4%                         | 12.2%                         | 0.4%                      | 0.1%                         | 2.2%                          | 0.4%                             | 0.1%                                | 2.2%                                 | 21.1%                 | 16.5%                    | 26.5%                     |       |
| 2017 | Renal Pelvis and Ureter | All           | Muscle-invasive     | All          | 717                     | 3.8%                              | 2.6%                  | 5.4%                   | 1.7%                              | 1.0%                  | 2.9%                   | 51.9%                   | 48.2%                      | 55.5%                       | 1.4%                 | 0.8%                    | 2.5%                     | 21.2%                     | 18.4%                        | 24.3%                         | 2.2%                      | 1.4%                         | 3.6%                          | 2.9%                             | 1.9%                                | 4.4%                                 | 14.9%                 | 12.5%                    | 17.7%                     |       |
| 2017 | Renal Pelvis and Ureter | All           | Stage unknown       | All          | 464                     | 11.4%                             | 8.8%                  | 14.6%                  | 6.3%                              | 4.4%                  | 8.8%                   | 4.1%                    | 2.6%                       | 6.3%                        | 4.3%                 | 2.8%                    | 6.6%                     | 1.3%                      | 0.6%                         | 2.8%                          | 0.0%                      | 0.0%                         | 0.8%                          | 0.2%                             | 0.0%                                | 1.2%                                 | 72.4%                 | 68.2%                    | 76.3%                     |       |
| 2017 | Bladder                 | Urothelial    | Non-muscle-invasive | T1           | 3579                    | 1.1%                              | 0.8%                  | 1.5%                   | 0.2%                              | 0.1%                  | 0.4%                   | 48.5%                   | 41.9%                      | 45.2%                       | 0.1%                 | 0.0%                    | 0.2%                     | 48.2%                     | 46.6%                        | 49.9%                         | 2.3%                      | 1.9%                         | 2.9%                          | 2.0%                             | 1.6%                                | 2.5%                                 | 2.5%                  | 2.1%                     | 3.1%                      |       |
| 2017 | Bladder                 | Urothelial    | Muscle-invasive     | All          | 3508                    | 10.6%                             | 9.7%                  | 11.7%                  | 21.0%                             | 19.7%                 | 22.4%                  | 9.4%                    | 8.5%                       | 10.4%                       | 16.8%                | 15.6%                   | 18.0%                    | 11.5%                     | 10.5%                        | 12.6%                         | 0.5%                      | 0.3%                         | 0.8%                          | 0.7%                             | 0.4%                                | 1.0%                                 | 29.5%                 | 28.0%                    | 31.0%                     |       |
| 2017 | Bladder                 | Urothelial    | Stage unknown       | All          | 1091                    | 8.2%                              | 6.8%                  | 10.0%                  | 5.0%                              | 3.8%                  | 6.4%                   | 0.6%                    | 0.3%                       | 1.2%                        | 1.7%                 | 1.0%                    | 2.6%                     | 0.6%                      | 0.3%                         | 1.3%                          | 0.1%                      | 0.0%                         | 0.5%                          | 0.0%                             | 0.0%                                | 0.4%                                 | 83.9%                 | 81.6%                    | 85.9%                     |       |
| 2017 | Bladder                 | Other         | All stages          | All          | 646                     | 7.1%                              | 5.4                   |                        |                                   |                       |                        |                         |                            |                             |                      |                         |                          |                           |                              |                               |                           |                              |                               |                                  |                                     |                                      |                       |                          |                           |       |
